# Supplementary material for: Smallest molecular chalcogenidometalate anions of the heaviest metals: syntheses, structures, and their interconversion
Source: Royal Society of Chemistry journal article supplement (doi:10.1039/c5dt03996g), 2015-11-16
Supplement: c5dt03996g1.pdf [file c5dt03996g1.pdf]

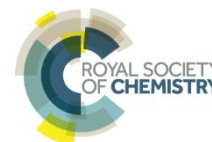

## Dalton Transactions

### Supporting Information

#### **Smallest Molecular Chalcogenidometalate Anions of the Heaviest Metals: Syntheses, Structures, and their Interconversion**

G. Thiele,<sup>a</sup> C. Donsbach,<sup>a</sup> R. Riedel,<sup>a</sup> M. Marsch,<sup>a</sup> K. Harms,<sup>a</sup> and S. Dehnen<sup>\*a</sup>

<sup>a</sup>Fachbereich Chemie, Wissenschaftliches Zentrum für Materialwissenschaften, Philipps-Universität Marburg, Hans-Meerwein-Straße, D-35043 Marburg, Germany, email: dehnen@chemie.uni-marburg.de

#### SUPPLEMENTARY INFORMATION

##### **Contents:**

**Supplementary details on single crystal X-ray crystallography**

**Details on quantum chemical calculations**

**References for the Supporting Information**

## Supplementary details on single crystal X-ray diffraction

**X-ray diffraction experiments.**  $\text{K}_3\text{BiSe}_3$  has been reported before, data for completeness only.<sup>[1]</sup> Data of the X-ray structure analysis: T = 100 K (**1-7**, **9**,  $\text{K}_3\text{BiSe}_3$ ) or 293 K (**8**), graphite monochromator (mirror optics for **9**), imaging plate detector Stoe IPDS2T (**1**, **4-6**), IPDS2 (**2**, **3**, **7**,  $\text{K}_3\text{BiSe}_3$ ), IPDS (**8**) or Bruker Quest (**9**). All structures were solved by direct methods in WinGX<sup>[2]</sup> and OLEX2<sup>[3]</sup> refined by full-matrix least-squares refinement against  $F^2$  in SHELXL-2014/7.<sup>[4]</sup> Absorption correction were performed numerically including shape optimization with STOE X-Area<sup>[5]</sup> (**1-8**,  $\text{K}_3\text{BiSe}_3$ ) or semi-empirically with Bruker SADABS (multi-scan, **9**).<sup>[6]</sup> Tables S1 – S4 summarize the crystallographic data of all crystalline compounds. CCDC 1430781 (**1**), 1430782 (**2**), 1430783 (**3**), 1430784 (**4**), 1430785 (**5**), 1430786 (**6**), 1430787 (**7**), 1430788 (**8**), 1430789 (**9**), and 1430790 ( $\text{K}_3\text{BiSe}_3$ ) contain the supplementary crystallographic data for this paper. These data can be obtained free of charge from The Cambridge Crystallographic Data Centre via [www.ccdc.cam.ac.uk/data\\_request/cif](http://www.ccdc.cam.ac.uk/data_request/cif). Refinement details and crystallographic information for compounds **1-10** are listed in Table S1-S3. Supplementary structure figures are provided in Figures S1-S13.

Table S1. Crystallographic and refinement details for Compounds **1 – 3**.

| Compound                                                             | $\text{K}_4[\text{HgSe}_3]\cdot\text{H}_2\text{O}$ ( <b>1</b> ) | $\text{K}_4[\text{HgTe}_3]\cdot\text{H}_2\text{O}$ ( <b>2</b> ) | $\text{K}_{10}\text{Na}_2[\text{HgTe}_3]_2(\text{HCO}_2)_3$ ( <b>3</b> ) |
|----------------------------------------------------------------------|-----------------------------------------------------------------|-----------------------------------------------------------------|--------------------------------------------------------------------------|
| Empirical formula                                                    | $\text{HgK}_4\text{OSe}_3$                                      | $\text{HgK}_4\text{OTe}_3$                                      | $\text{C}_3\text{Hg}_2\text{K}_{10}\text{Na}_2\text{O}_6\text{Te}_6$     |
| Formula weight /g·mol <sup>-1</sup>                                  | 609.87                                                          | 755.79                                                          | 1735.79                                                                  |
| Crystal color and shape                                              | Clear yellow block                                              | Metallic black block                                            | Red stick                                                                |
| Crystal size /mm                                                     | 0.09·0.13·0.15                                                  | 0.03·0.05·0.07                                                  | 0.07·0.08·0.26                                                           |
| Crystal system                                                       | Monoclinic                                                      | Orthorhombic                                                    | Monoclinic                                                               |
| Space group                                                          | $P2_1$                                                          | $P2_12_12_1$                                                    | $C2/m$                                                                   |
| $a$ /Å                                                               | 8.4929(4)                                                       | 9.0201(4)                                                       | 14.4612(11)                                                              |
| $b$ /Å                                                               | 9.6479(3)                                                       | 10.1697(4)                                                      | 11.0898(11)                                                              |
| $c$ /Å                                                               | 13.1996(6)                                                      | 14.0216(7)                                                      | 9.9243(8)                                                                |
| $\beta$ /°                                                           | 90.066(4)                                                       |                                                                 | 93.367(10)                                                               |
| $V$ /Å <sup>3</sup>                                                  | 1081.56(8)                                                      | 1286.23(10)                                                     | 1588.8(2)                                                                |
| $Z$                                                                  | 4                                                               | 4                                                               | 2                                                                        |
| $\rho_{\text{calc}}/\text{g}\cdot\text{cm}^{-3}$                     | 3.745                                                           | 3.903                                                           | 3.628                                                                    |
| $\mu(\text{MoK}\alpha)/\text{mm}^{-1}$                               | 25.801                                                          | 19.876                                                          | 16.405                                                                   |
| $2\theta$ range/°                                                    | 4.22–63.86                                                      | 4.94–58.25                                                      | 4.11–53.29                                                               |
| Abs. corr. $T_{\text{min}}/T_{\text{max}}$                           | 0.2342 / 0.6341                                                 | 0.2743 / 0.6320                                                 | 0.0980 / 0.4974                                                          |
| Reflections measured                                                 | 25771                                                           | 25063                                                           | 10793                                                                    |
| Independent reflections                                              | 7227                                                            | 3449                                                            | 1777                                                                     |
| $R(\text{int})$                                                      | 0.0955                                                          | 0.0620                                                          | 0.0455                                                                   |
| Independent reflections ( $I > 3\sigma(I)$ )                         | 6656                                                            | 3363                                                            | 1712                                                                     |
| Parameters                                                           | 165                                                             | 84                                                              | 81                                                                       |
| $R_1(I > 3\sigma(I))$                                                | 0.0498                                                          | 0.0220                                                          | 0.0215                                                                   |
| $wR_2$ (all data)                                                    | 0.1174                                                          | 0.0480                                                          | 0.0496                                                                   |
| Goof (all data)                                                      | 1.006                                                           | 1.055                                                           | 1.081                                                                    |
| Max. peak / hole /e <sup>-</sup> ·10 <sup>-6</sup> ·pm <sup>-3</sup> | 2.775 / -6.997                                                  | 1.064 / -0.935                                                  | 0.155 / -1.249                                                           |
| CCDC number                                                          | 1430781                                                         | 1430782                                                         | 1430783                                                                  |

Table S2. Crystallographic and refinement details for Compounds 4 – 6.

| Compound                                                             | K <sub>2</sub> [HgSe <sub>2</sub> ]·H <sub>2</sub> O (4) | K <sub>6</sub> [Tl <sub>2</sub> Se <sub>6</sub> ]·2H <sub>2</sub> O (5) | K <sub>6</sub> [Tl <sub>2</sub> Se <sub>6</sub> ]·2K <sub>2</sub> CO <sub>3</sub> (6) |
|----------------------------------------------------------------------|----------------------------------------------------------|-------------------------------------------------------------------------|---------------------------------------------------------------------------------------|
| Empirical formula                                                    | HgK <sub>2</sub> OSe <sub>2</sub>                        | K <sub>6</sub> O <sub>2</sub> Se <sub>6</sub> Tl <sub>2</sub>           | C <sub>2</sub> K <sub>10</sub> O <sub>6</sub> Se <sub>6</sub> Tl <sub>2</sub>         |
| Formula weight /g·mol <sup>-1</sup>                                  | 452.71                                                   | 1149.10                                                                 | 1393.52                                                                               |
| Crystal color and shape                                              | Orange block                                             | Red plates                                                              | Orange block                                                                          |
| Crystal size /mm                                                     | 0.09·0.10·0.11                                           | 0.03·0.05·0.27                                                          | 0.04·0.09·0.12                                                                        |
| Crystal system                                                       | Monoclinic                                               | Triclinic                                                               | Triclinic                                                                             |
| Space group                                                          | <i>P</i> 2 <sub>1</sub> / <i>c</i>                       | <i>P</i> $\bar{1}$                                                      | <i>P</i> $\bar{1}$                                                                    |
| <i>a</i> /Å                                                          | 12.0228(7)                                               | 7.6343(9)                                                               | 7.2063(7)                                                                             |
| <i>b</i> /Å                                                          | 7.7956(5)                                                | 8.3256(10)                                                              | 8.6457(8)                                                                             |
| <i>c</i> /Å                                                          | 7.4526(4)                                                | 8.4777(10)                                                              | 10.6249(10)                                                                           |
| $\alpha$ /°                                                          |                                                          | 94.535(10)                                                              | 70.120(7)                                                                             |
| $\beta$ /°                                                           | 92.853(4)                                                | 103.250(9)                                                              | 88.516(8)                                                                             |
| $\gamma$ /°                                                          |                                                          | 108.831(9)                                                              | 79.234(8)                                                                             |
| <i>V</i> /Å <sup>3</sup>                                             | 697.63(7)                                                | 489.53(11)                                                              | 611.06(10)                                                                            |
| <i>Z</i>                                                             | 4                                                        | 1                                                                       | 1                                                                                     |
| $\rho_{\text{calc}}$ /g·cm <sup>-3</sup>                             | 4.310                                                    | 3.898                                                                   | 3.787                                                                                 |
| $\mu(\text{MoK}\alpha)$ /mm <sup>-1</sup>                            | 33.572                                                   | 28.849                                                                  | 23.824                                                                                |
| 2 $\theta$ range/°                                                   | 3.39–55.99                                               | 5.01–53.42                                                              | 4.08–53.22                                                                            |
| Abs. corr. <i>T</i> <sub>min</sub> / <i>T</i> <sub>max</sub>         | 0.0080 / 0.1879                                          | 0.0607 / 0.4403                                                         | 0.0664 / 0.3569                                                                       |
| Reflections measured                                                 | 4436                                                     | 3592                                                                    | 5713                                                                                  |
| Independent reflections                                              | 1475                                                     | 1696                                                                    | 2570                                                                                  |
| <i>R</i> (int)                                                       | 0.0864                                                   | 0.1028                                                                  | 0.1418                                                                                |
| Independent reflections ( <i>I</i> > 3 $\sigma$ ( <i>I</i> ))        | 1304                                                     | 1471                                                                    | 2449                                                                                  |
| Parameters                                                           | 56                                                       | 74                                                                      | 119                                                                                   |
| <i>R</i> <sub>1</sub> ( <i>I</i> > 3 $\sigma$ ( <i>I</i> ))          | 0.0429                                                   | 0.0600                                                                  | 0.0658                                                                                |
| <i>wR</i> <sub>2</sub> (all data)                                    | 0.1084                                                   | 0.1603                                                                  | 0.1773                                                                                |
| Goof (all data)                                                      | 1.050                                                    | 1.034                                                                   | 1.094                                                                                 |
| Max. peak / hole /e <sup>-</sup> ·10 <sup>-6</sup> ·pm <sup>-3</sup> | 4.190 / -2.746                                           | 2.872 / -2.399                                                          | 4.761 / -5.063                                                                        |
| CCDC number                                                          | 1430784                                                  | 1430785                                                                 | 1430786                                                                               |

Table S3. Crystallographic and refinement details for Compounds **7** – **9**.

| Compound                                                          | $\text{K}_{0.94}\text{Tl}_{0.06}[\text{TlSe}_2]$ ( <b>7</b> ) | $\{\text{K}_5[\text{TlTe}_4]\cdot 2\text{KOH}\}_3\cdot 10\text{H}_2\text{O}$ ( <b>8</b> ) | $\text{K}_4[\text{PbSe}_4]\cdot \text{en}\cdot \text{H}_2\text{O}$ ( <b>9</b> ) |
|-------------------------------------------------------------------|---------------------------------------------------------------|-------------------------------------------------------------------------------------------|---------------------------------------------------------------------------------|
| Empirical formula                                                 | $\text{K}_{0.94}\text{Se}_2\text{Tl}_{1.06}$                  | $\text{K}_{21}\text{O}_{16}\text{Te}_{12}\text{Tl}_3$                                     | $\text{C}_2\text{H}_{10}\text{K}_4\text{N}_2\text{OPbSe}_4$                     |
| Formula weight / $\text{g}\cdot\text{mol}^{-1}$                   | 410.89                                                        | 3221.41                                                                                   | 757.55                                                                          |
| Crystal color and shape                                           | Black block                                                   | Red block                                                                                 | Red block                                                                       |
| Crystal size /mm                                                  | 0.08-0.10-0.12                                                | 0.20-0.21-0.30                                                                            | 0.08-0.10-0.13                                                                  |
| Crystal system                                                    | Tetragonal                                                    | Trigonal                                                                                  | Triclinic                                                                       |
| Space group                                                       | $I4/mcm$                                                      | $R\bar{3}c$                                                                               | $P\bar{1}$                                                                      |
| $a/\text{\AA}$                                                    | 8.0075(12)                                                    | 16.9135(16)                                                                               | 8.0377(5)                                                                       |
| $b/\text{\AA}$                                                    |                                                               |                                                                                           | 8.1958(5)                                                                       |
| $c/\text{\AA}$                                                    | 7.0104(9)                                                     | 39.226(6)                                                                                 | 12.6944(7)                                                                      |
| $\alpha/^\circ$                                                   |                                                               |                                                                                           | 92.602(2)                                                                       |
| $\beta/^\circ$                                                    |                                                               |                                                                                           | 102.770(2)                                                                      |
| $\gamma/^\circ$                                                   |                                                               |                                                                                           | 93.193(2)                                                                       |
| $V/\text{\AA}^3$                                                  | 449.51(15)                                                    | 9718(2)                                                                                   | 812.87(8)                                                                       |
| $Z$                                                               | 4                                                             | 6                                                                                         | 2                                                                               |
| $\rho_{\text{calc}}/\text{g}\cdot\text{cm}^{-3}$                  | 6.072                                                         | 3.303                                                                                     | 3.095                                                                           |
| $\mu(\text{MoK}\alpha)/\text{mm}^{-1}$                            | 54.829                                                        | 14.126                                                                                    | 20.333                                                                          |
| $2\theta$ range/ $^\circ$                                         | 7.19-53.34                                                    | 4.81-51.01                                                                                | 4.98-54.31                                                                      |
| Abs. corr. $T_{\text{min}}/T_{\text{max}}$                        | 0.0091 / 0.1154                                               | 0.0125 / 0.0816                                                                           | 0.2086 / 0.7455                                                                 |
| Reflections measured                                              | 3160                                                          | 19680                                                                                     | 34827                                                                           |
| Independent reflections                                           | 147                                                           | 2014                                                                                      | 3611                                                                            |
| $R(\text{int})$                                                   | 0.1902                                                        | 0.2312                                                                                    | 0.0560                                                                          |
| Independent reflections ( $I > 3\sigma(I)$ )                      | 145                                                           | 1330                                                                                      | 3462                                                                            |
| Parameters                                                        | 11                                                            | 81                                                                                        | 151                                                                             |
| $R_1(I > 3\sigma(I))$                                             | 0.0272                                                        | 0.0583                                                                                    | 0.0181                                                                          |
| $wR_2$ (all data)                                                 | 0.0567                                                        | 0.1449                                                                                    | 0.0405                                                                          |
| Goof (all data)                                                   | 1.232                                                         | 0.892                                                                                     | 1.132                                                                           |
| Max. peak / hole / $\text{e}^{-}\cdot 10^{-6}\cdot\text{pm}^{-3}$ | 1.824 / -1.322                                                | 1.667 / -2.212                                                                            | 1.332 / -1.396                                                                  |
| CCDC number                                                       | 1430787                                                       | 1430788                                                                                   | 1430789                                                                         |

Table S4. Crystallographic and refinement details for  $K_3BiSe_3$  (**10**).

| Compound                                            | $K_3BiSe_3$ ( <b>10</b> ) |
|-----------------------------------------------------|---------------------------|
| Empirical formula                                   | $BiK_3Se_3$               |
| Formula weight / $g \cdot mol^{-1}$                 | 563.16                    |
| Crystal color and shape                             | Orange block              |
| Crystal size /mm                                    | 0.03·0.04·0.05            |
| Crystal system                                      | Cubic                     |
| Space group                                         | $P2_13$                   |
| $a / \text{\AA}$                                    | 9.7193(3)                 |
| $V / \text{\AA}^3$                                  | 918.13(9)                 |
| $Z$                                                 | 4                         |
| $\rho_{calc} / g \cdot cm^{-3}$                     | 4.074                     |
| $\mu(MoK\alpha) / mm^{-1}$                          | 32.361                    |
| $2\theta$ range/ $^\circ$                           | 5.92–53.30                |
| Abs. corr. $T_{min}/T_{max}$                        | 0.2349 / 0.4811           |
| Reflections measured                                | 5430                      |
| Independent reflections                             | 660                       |
| $R(int)$                                            | 0.0878                    |
| Independent reflections ( $I > 3\sigma(I)$ )        | 611                       |
| Parameters                                          | 22                        |
| $R_1(I > 3\sigma(I))$                               | 0.0231                    |
| $wR_2$ (all data)                                   | 0.0403                    |
| Goof (all data)                                     | 0.925                     |
| Max. peak / hole $/e^- \cdot 10^{-6} \cdot pm^{-3}$ | 0.669 / -0.584            |
| CCDC number                                         | 1430790                   |

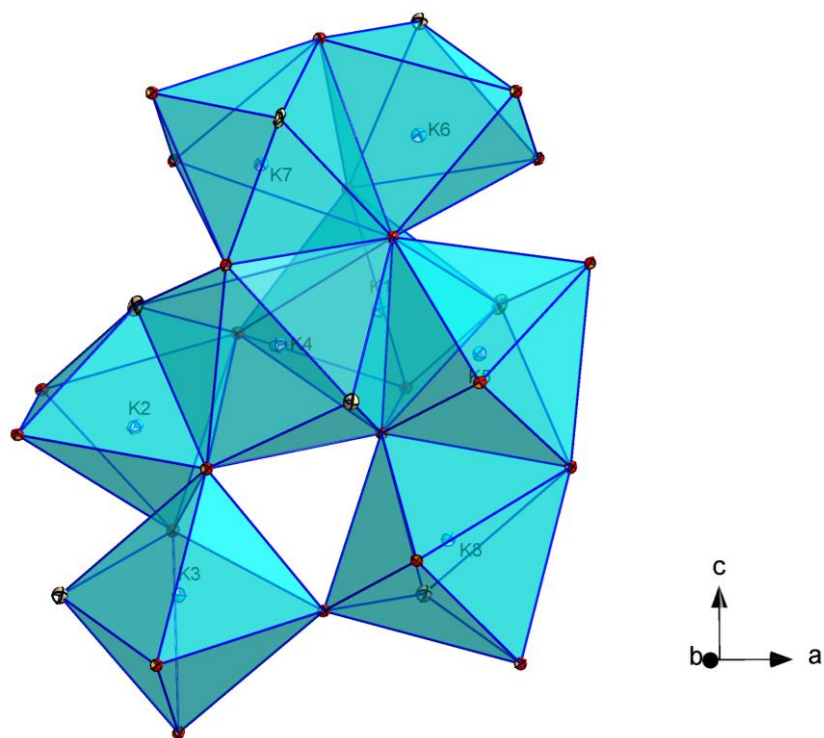

Figure S1. Representation of the  $K^+$  environment in the crystal structure of **1**. Ellipsoids are drawn at 50% probability.

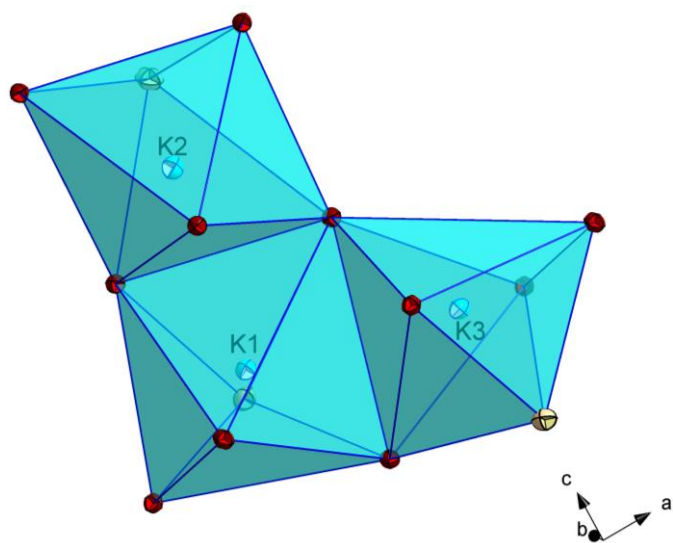

Figure S2. Representation of the  $K^+$  environment in the crystal structure of **2**. Ellipsoids are drawn at 50% probability.

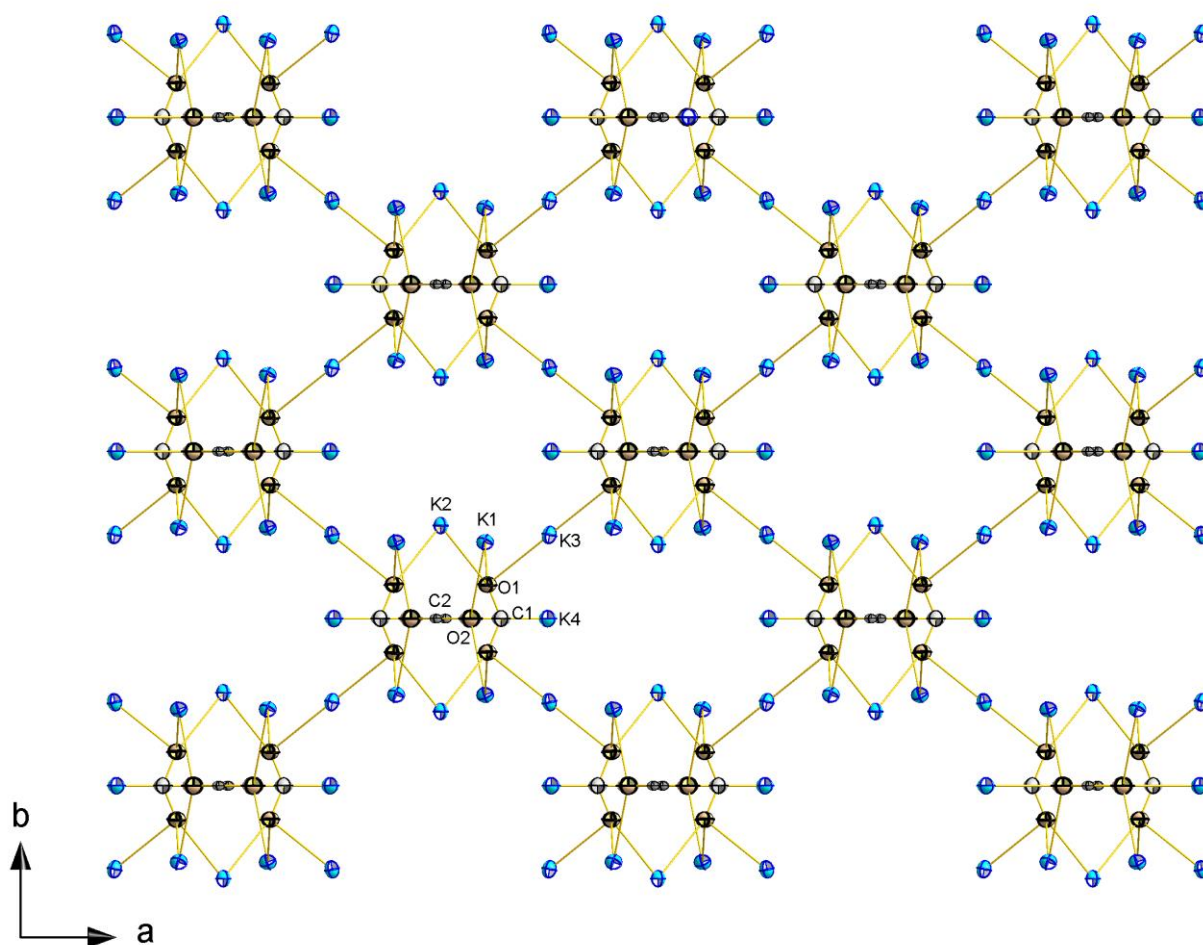

Figure S3. Representation of the packing of anions and cations in the crystal structure of **3**. View along [001]. Ellipsoids are drawn at 50% probability.

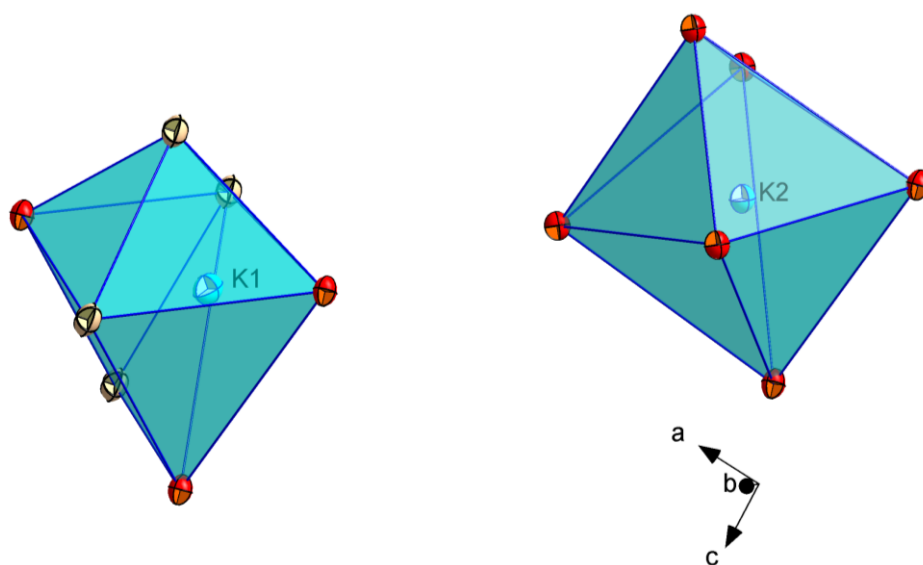

Figure S4. Representation of the K<sup>+</sup> environment in the crystal structure of **4**. Ellipsoids are drawn at 50% probability.

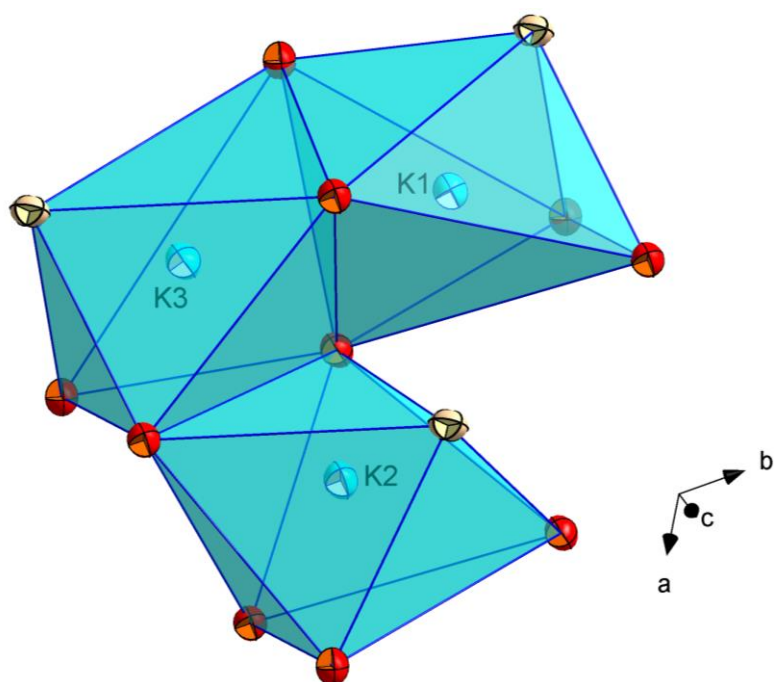

Figure S5. Representation of the  $\text{K}^+$  environment in the crystal structure of **5**. Ellipsoids are drawn at 50% probability.

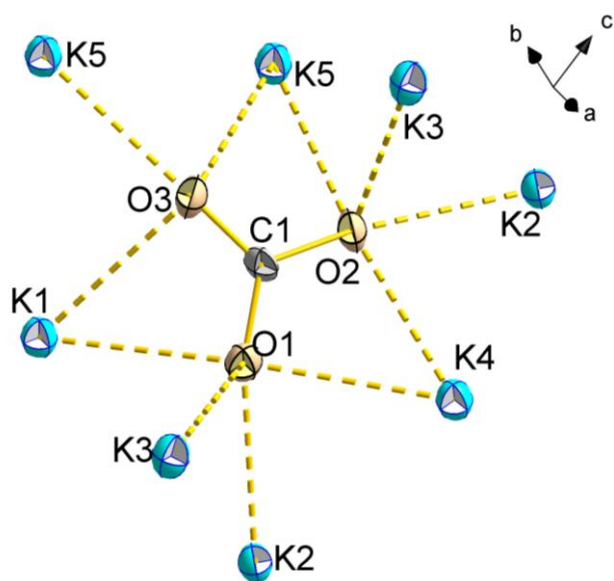

Figure S6. Representation of the  $[\text{CO}_3]^{2-}$  environment in the crystal structure of **6**. Ellipsoids are drawn at 50% probability.



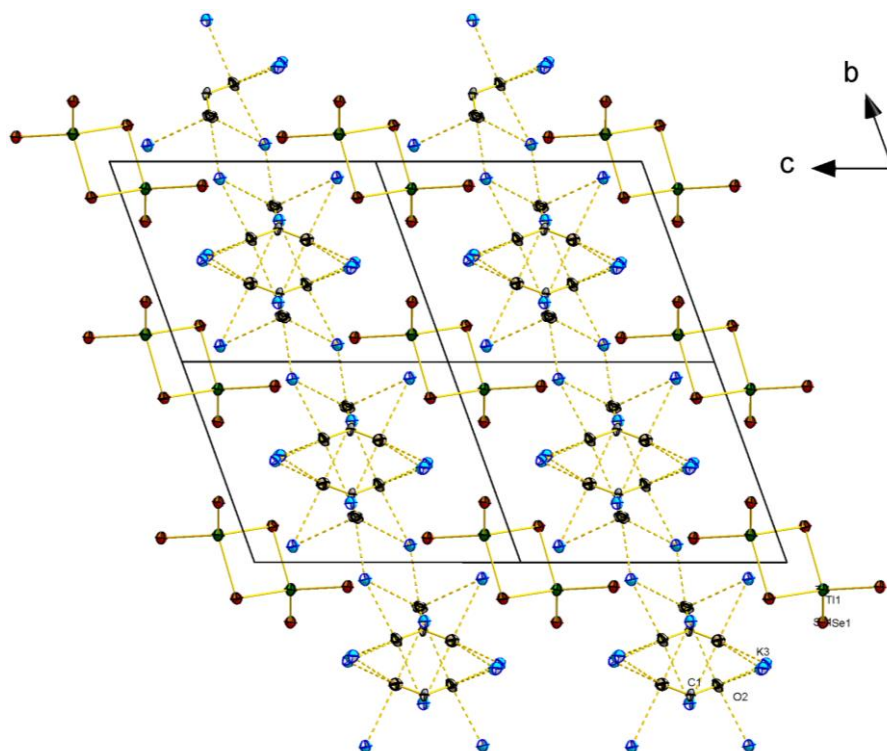

Figure S7. Representation of the packing of cations and anions in the crystal structure of **6**. View along [100]. Ellipsoids are drawn at 50% probability.

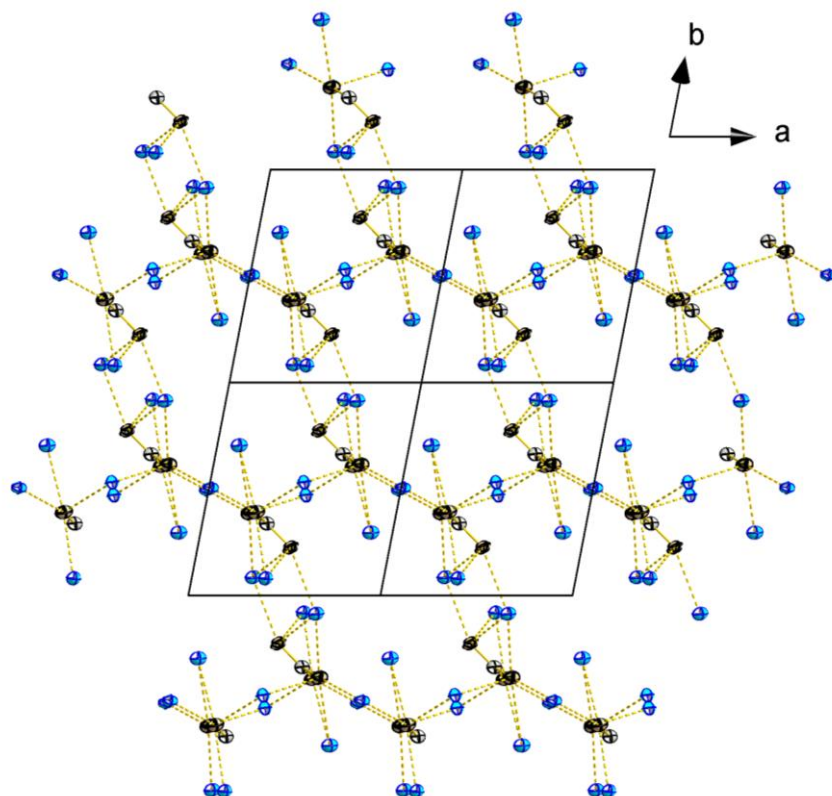

Figure S8. Representation of the packing of cations and anions in the crystal structure of **6**. View along [001]. Ellipsoids are drawn at 50% probability.

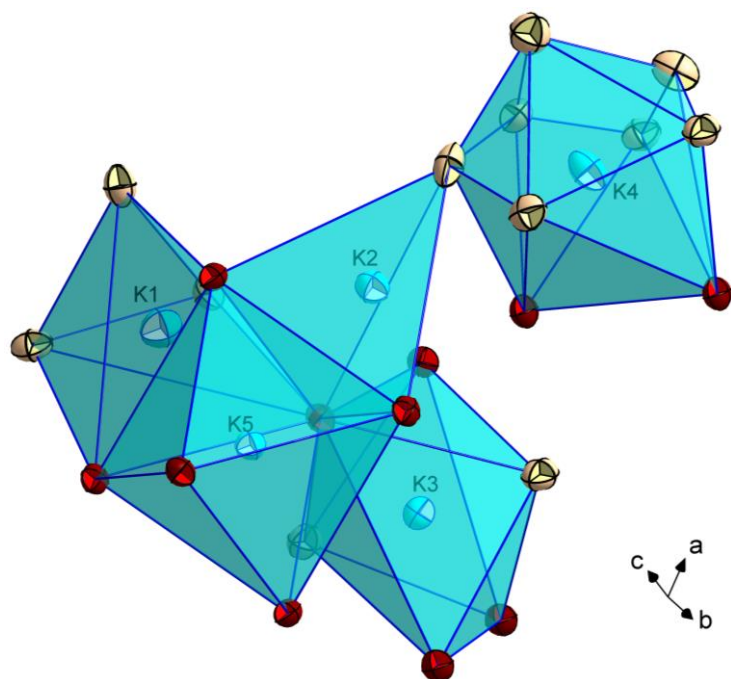

Figure S9. Representation of the  $K^+$  environment in the crystal structure of **8**. Ellipsoids are drawn at 50% probability.

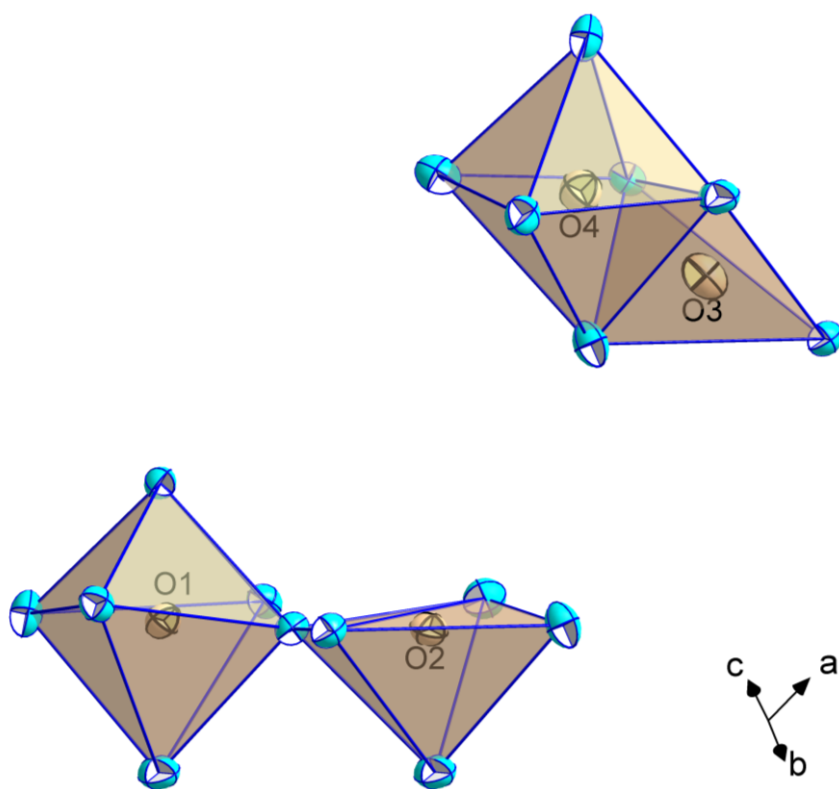

Figure S10. Representation of the O environment in the crystal structure of **8**. Ellipsoids are drawn at 50% probability.

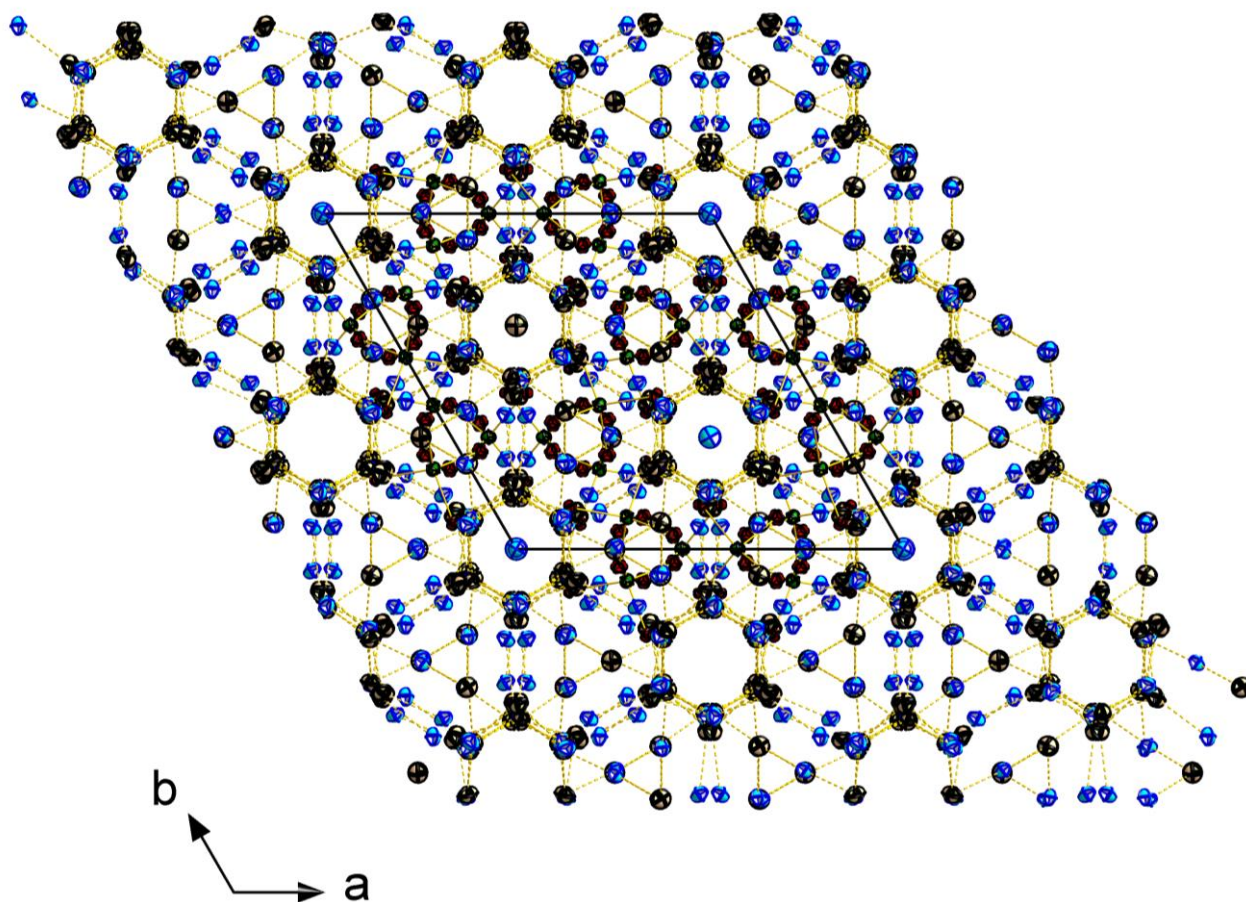

Figure S11. Representation of the packing of cations and anions in the crystal structure of **8**. View along [001]. Ellipsoids are drawn at 50% probability.

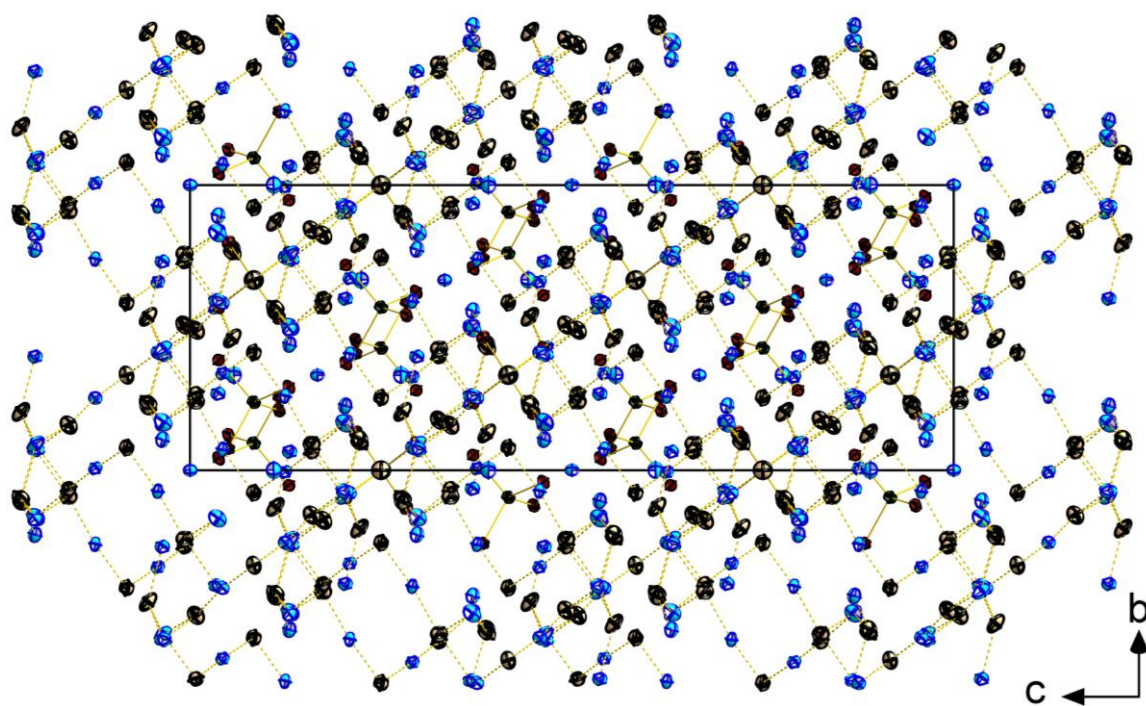

Figure S12. Representation of the packing of cations and anions in the crystal structure of **8**. View along [100]. Ellipsoids are drawn at 50% probability.





## Details on quantum chemical calculations

All molecular electronic structure calculations were carried out with the TURBOMOLE program package V6.6.<sup>[7]</sup> COSMO was used for the compensation of negative charges, applying the default parameters with  $\epsilon = \infty$ .<sup>[8]</sup> Structure optimizations were undertaken by employment of the RIDFT program, using the BP86 functional<sup>[9]</sup> and def2-TZVP basis sets with respective ECPs.<sup>[10]</sup> The optimized structures were confirmed to be local minima on the energy hypersurface by means of calculations of the 2<sup>nd</sup> derivative of the energy. Figure S14-S17 summarize all calculated species along with their total energy values.

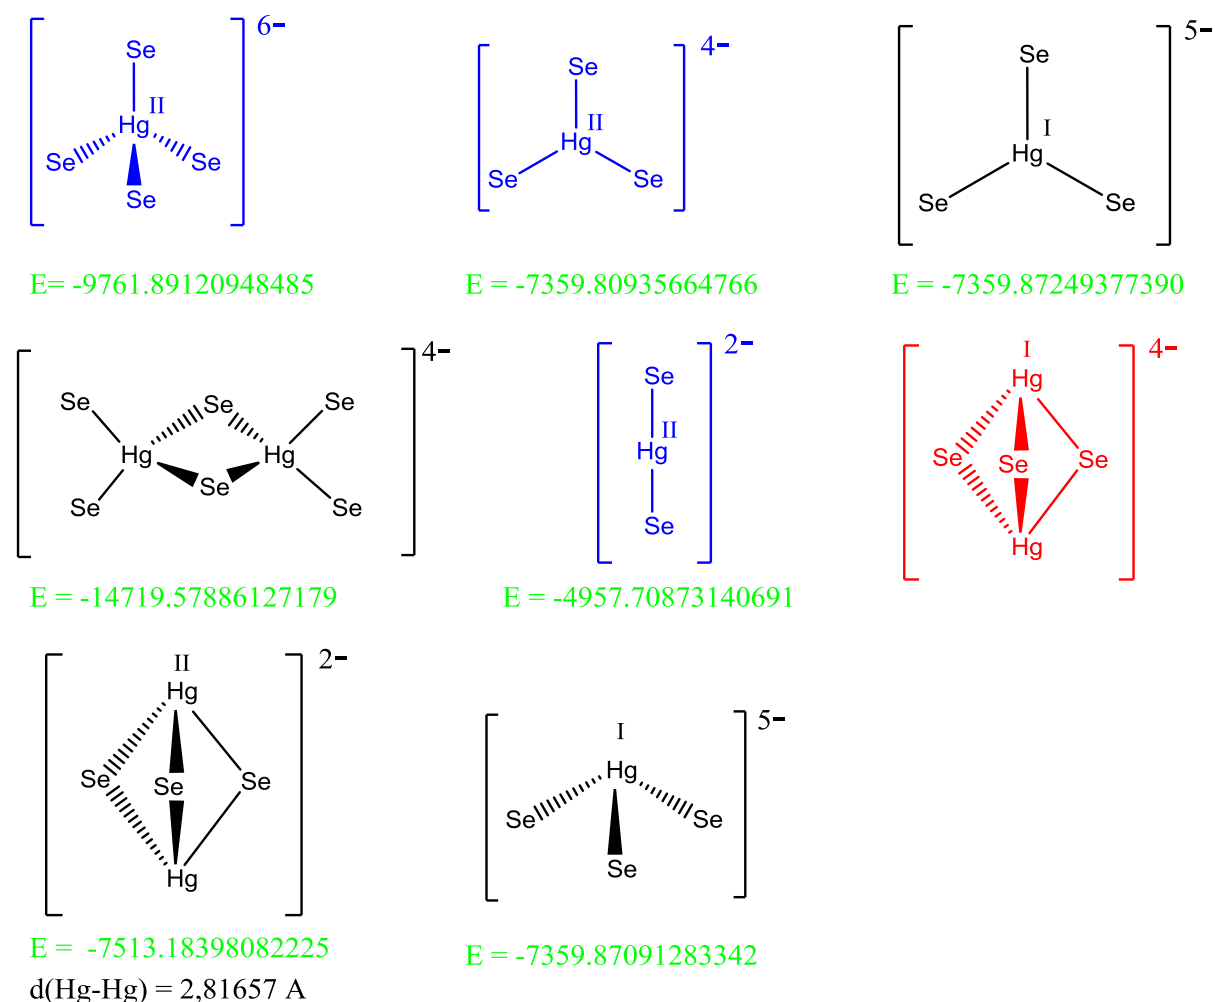

Figure S14. Schematic drawing of chalcogenidoplumbate anions calculated by means of quantum chemical methods, along corresponding total energies. Red coloured structures indicate that no convergence could be achieved. Blue coloured structures indicate experimentally determined structural motifs. Green coloured energy values indicate (local) minima on the energy hypersurface. All energy values in Hartree.

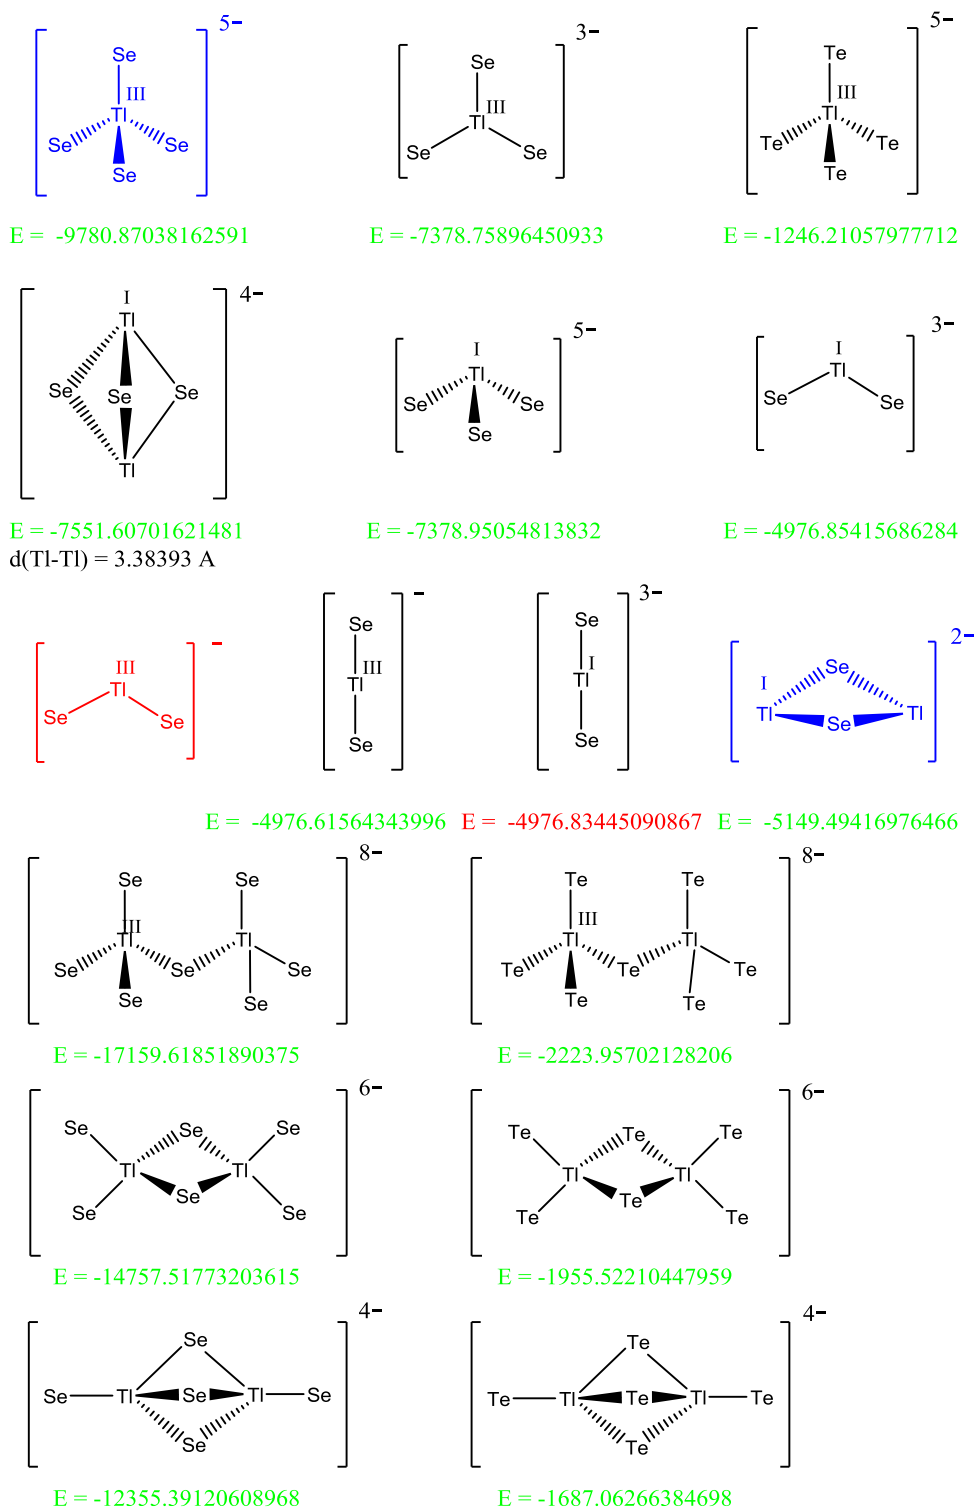

Figure S15. Schematic drawing of selenidothallate anions calculated by means of quantum chemical methods, along with corresponding total energies. Red coloured structures indicate that no convergence could be achieved. Blue coloured structures indicate experimentally determined structural motifs. Green coloured energy values indicate (local) minima on the energy hypersurface. Red coloured energy value indicate imaginary vibrational modes. All energy values in Hartree.

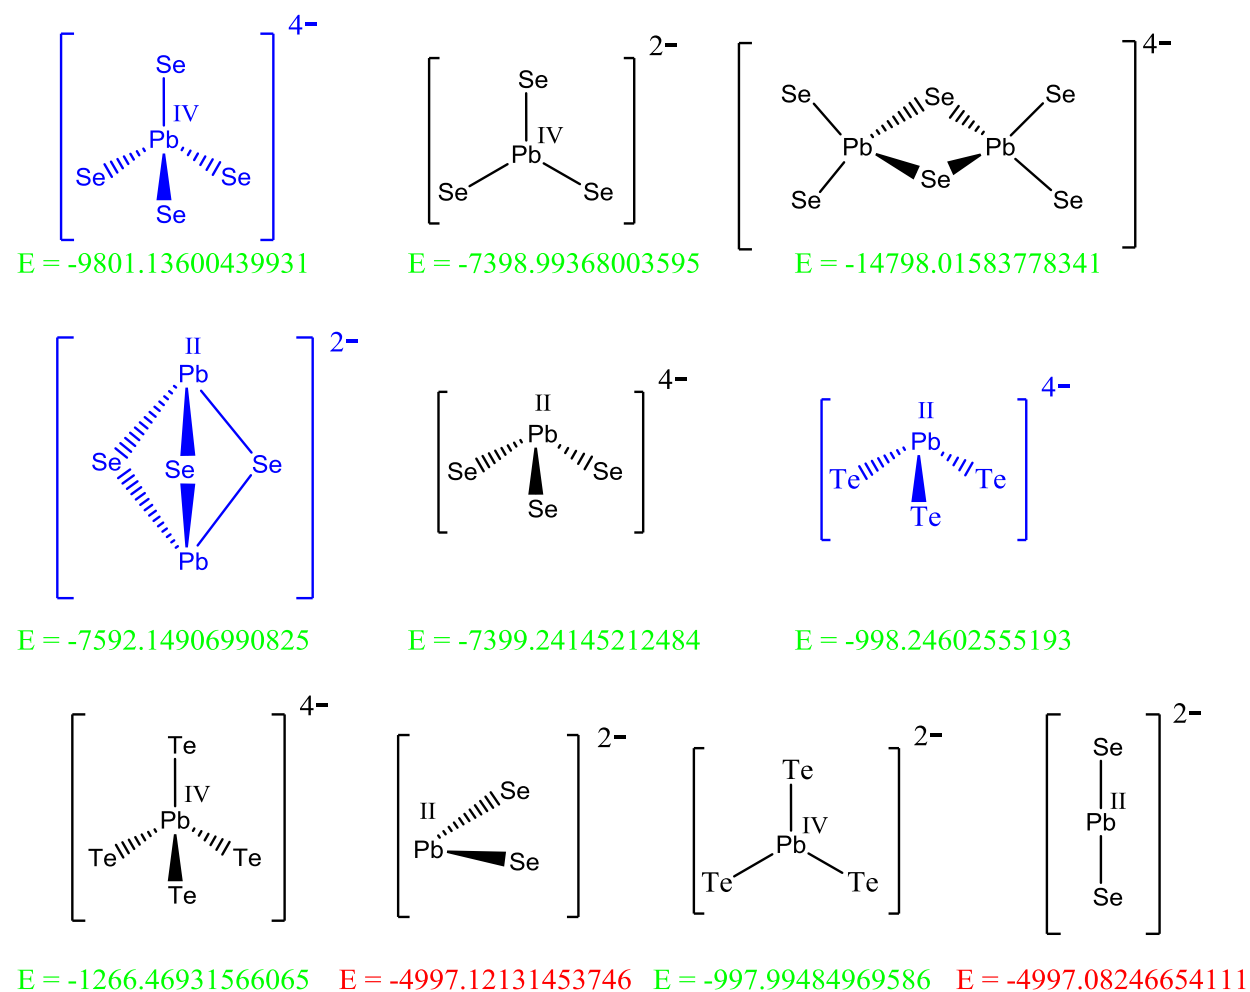

Figure S16. Schematic drawing of chalcogenidoplumbate anions calculated by means of quantum chemical methods, along with corresponding total energies. Blue coloured structures indicate experimentally determined structural motifs. Green coloured energy values indicate (local) minima on the energy hypersurface. Red coloured energy value indicate imaginary vibrational modes. All energy values in Hartree.

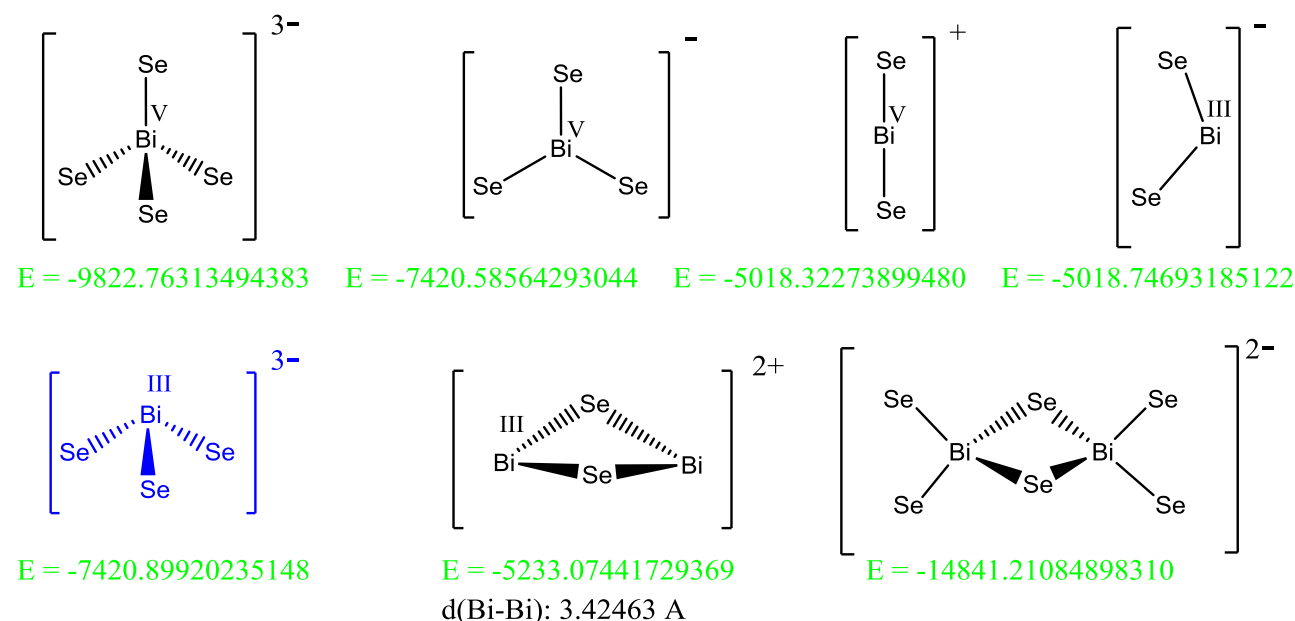

Figure S17. Schematic drawing of selenidobismuthate anions calculated by means of quantum chemical methods, along with corresponding total energies. Blue coloured structures indicate experimentally determined structural motifs. Green coloured energy values indicate (local) minima on the energy hypersurface. All energy values in Hartree.

## References for the Supporting Information

- 1 W. Bronger, A. Donike, D. Schmitz, *Z. Anorg. Allg. Chem.*, 1996, **622**, 1003.
- 2 Louis J. Farrugia, *WinGX for MS-Windows V2013-7*, University of Glasgow, United Kingdom, 2013.
- 3 O. V. Dolomanov, L. J. Bourhis, R. J. Gildea, J. A. K. Howard, H. Puschmann, *Appl. Cryst.* 2009, **42**, 339.
- 4 G. M. Sheldrick, *SHELXL-2014/7*, University of Göttingen, Germany, 2014.
- 5 X-Area version 1.56, Stoe & Cie GmbH, Darmstadt, Germany, 2011.
- 6 Bruker (2007). SADABS Bruker AXS Inc., Madison, Wisconsin, USA.
- 7 Turbomole Version 6.6, Turbomole GmbH 2014. Turbomole is a development of University of Karlsruhe and Forschungszentrum Karlsruhe 1989–2007, Turbomole GmbH since 2007; F. Furche, R. Ahlrichs, C. Hättig, W. Klopper, M. Sierka, F. Weigend, *WIREs Comput. Mol. Sci.*, 2014, **4**, 91; F. Weigend, *Phys. Chem. Chem. Phys.*, 2006, **8**, 1057.
- 8 A. Klamt, G. Schuurmann, *J. Chem. Soc. Perkin Trans.*, 1993, **2**, 799.
- 9 A. D. Becke, *Phys. Rev. A*, 1988, **38**, 3098; J. P. Perdew, *Phys. Rev. B*, 1986, **33**, 8822.
- 10 F. Weigend, R. Ahlrichs, *Phys. Chem. Chem. Phys.*, 2005, **7**, 3297; F. Weigend, *Phys. Chem. Chem. Phys.*, 2006, **8**, 1057; M. Dolg, H. Stoll, A. Savin, H. Preuss, *Theor. Chim. Acta*, 1989, **75**, 173; H. Stoll, B. Metz, M. Dolg, *J. Comput. Chem.*, 2002, **23**, 767.
